# Supplementary material
Source: HighWire-hosted journal article supplement (https://cmaj.ca/highwire/filestream/71803/field_highwire_adjunct_files/0/180839-res-1-at.pdf)
Supplement: 180839-res-1-at.pdf [file 180839-res-1-at.pdf]

**Appendix 1 (as supplied by the authors): Sociodemographic survey used at the St. Michael's Hospital Academic Family Health Team**

Modified from the original survey published previously in “We ask because we care,” the Tri-Hospital + TPH Health Equity Data Collection Research Project Final Report<sup>32</sup>, and previously published as an appendix to articles in the Journal of the American Board of Family Medicine.<sup>31</sup>

**Measuring Health Equity**

Please tell us about yourself.

We want to ask you 11 brief questions as part of our ongoing work to improve access, quality of care for all patients and identify health inequities. It should take approximately 2-5 minutes to complete.

Your participation is VOLUNTARY and you can stop at any time.

You do not have to complete the survey if you don't want to. You can skip questions.

The information you share with us will be safely kept with your medical file.

This will not affect your access to care.

**PLEASE NOTE SURVEY IS DOUBLE-SIDED**

1. What language would you feel most comfortable speaking in with your healthcare provider?  
Choose **ONE**.

|                     |           |          |                      |
|---------------------|-----------|----------|----------------------|
| Choose one          | Greek     | Punjabi  | Vietnamese           |
| English             | Hebrew    | Russian  | Other                |
| Amharic             | Hindi     | Serbian  | Prefer not to answer |
| Arabic              | Hungarian | Slovak   | Do not know          |
| ASL                 | Inuktitut | Somali   | Prefer not to answer |
| Bengali             | Italian   | Spanish  | Do not know          |
| Chinese (Cantonese) | Karen     | Tagalog  |                      |
| Chinese (Mandarin)  | Korean    | Tamil    |                      |
| Cree                | Nepali    | Tigrinya |                      |
| Czech               | Ojibwe    | Turkish  |                      |
| Dari                | Oji-Cree  | Twi      |                      |

*Routine collection of sexual orientation and gender identity data: a mixed-methods study*

|        |            |           |
|--------|------------|-----------|
| Farsi  | Polish     | Ukrainian |
| French | Portuguese | Urdu      |

2. Were you born in Canada?

Yes

No

Prefer not to answer

Do not know

*Routine collection of sexual orientation and gender identity data: a mixed-methods study*

If no, what year did you arrive in Canada? \_\_\_\_\_

3. Which of the following best describes your racial or ethnic group? Choose **ONE**.

- Asian – East (e.g. Chinese, Japanese, Korean)
- Asian – South (e.g. Indian, Pakistani, Sri Lankan)
- Asian – South East (e.g. Malaysian, Filipino, Vietnamese)
- Black – African (e.g. Ghanaian, Kenyan, Somali)
- Black – Caribbean (e.g. Barbadian, Jamaican)
- Black – North American (e.g. Canadian, American)
- First Nations
- Indian – Caribbean (e.g. Guyanese with origins in India)
- Indigenous/Aboriginal not included elsewhere
- Inuit
- Latin American (e.g. Argentinean, Chilean, Salvadorian)
- Métis
- Middle Eastern (e.g. Egyptian, Iranian, Lebanese)
- White – European (e.g. English, Italian, Portuguese, Russian)
- White – North American (e.g. American, Canadian)
- Mixed Heritage (e.g. Black – African and White-North American)
- Other (s)
- Prefer not to answer
- Do not know

4. Do you have any of the following? (Circle **ALL** that apply)

- None
- Chronic illness
- Developmental Disability
- Learning disability
- Mental illness
- Physical disability
- Sensory disability (i.e. hearing or vision loss)
- Drug or alcohol dependence
- Other
- Prefer not to answer
- Do not know

*Routine collection of sexual orientation and gender identity data: a mixed-methods study*

5. What is your gender? (Circle **ALL** that apply)

Female  Male  Trans – Female to Male  Trans – Male to Female

Intersex  Prefer not to answer  Do not know  Other

6. What is your sexual orientation? Choose **ONE**.

Heterosexual (“Straight”, male/female relationships)

Gay

Lesbian

Bisexual

Two-Spirit

Queer

Prefer not to answer

Do not know

Other

7. What was your total family income before taxes last year? Choose **ONE**.

\$0 to \$29,999

\$30,000 to \$59,999

\$60,000 to \$89,999

\$90,000 to \$119,999

\$120,000 to \$149,999

\$150,000 or more

Prefer not to answer

Do not know

8. How many people does your income support? Choose **ONE**.

0

1

2

*Routine collection of sexual orientation and gender identity data: a mixed-methods study*

- 3
- 4
- 5
- 6
- 7
- 8
- 9
- 10+
- Prefer not to answer
- Do not know

9. In what language would you prefer to read healthcare information? Choose **ONE**.

|                       |            |                      |             |
|-----------------------|------------|----------------------|-------------|
| English               | Hindi      | Slovak               | Do not know |
| Amharic               | Hungarian  | Somali               |             |
| Arabic                | Inuktitut  | Spanish              |             |
| Bengali               | Italian    | Serbian              |             |
| Braille               | Karen      | Tagalog              |             |
| Chinese (Simplified)  | Korean     | Tamil                |             |
| Chinese (Traditional) | Nepali     | Tigrinya             |             |
| Cree                  | Ojibwe     | Turkish              |             |
| Czech                 | Oji-Cree   | Twi                  |             |
| Dari                  | Polish     | Ukrainian            |             |
| Farsi                 | Portuguese | Urdu                 |             |
| French                | Punjabi    | Vietnamese           |             |
| Greek                 | Russian    | Other                |             |
| Hebrew                | Serbian    | Prefer not to answer |             |

10. What is your religious or spiritual affiliation? Check **ONE** only.

- I do not have an religious or spiritual affiliation
- Christian Orthodox

*Routine collection of sexual orientation and gender identity data: a mixed-methods study*

- Protestant
- Roman Catholic
- Christian, not included elsewhere on this list
- Animism or Shamanism
- Atheism
- Baha'i Faith
- Buddhism
- Confucianism
- Hinduism
- Islam
- Jainism
- Jehovah's Witness
- Judaism
- Native Spirituality
- Pagan
- Rastafarianism
- Sikhism
- Spiritualism
- Unitarianism
- Zoroastrianism
- Other
- Prefer not to answer
- Do not know

11. What type of housing do you live in? Choose **ONE**.

- Own Home
- Renting Home
- Boarding Home

*Routine collection of sexual orientation and gender identity data: a mixed-methods study*

- Correctional Facility
- Homeless/on Street
- Group Home
- Shelter/Hostel
- Supportive Housing
- Other
- Prefer not to answer
- Do not know

Thank you for participating in this survey.
